# Supplementary material for: Antibacterial Activity and Mechanisms of Plant Flavonoids against Gram-Negative Bacteria Based on the Antibacterial Statistical Model
Source: Preprints.org preprint supplement (doi:10.20944/preprints202401.0115.v3), 2024-02-20
Supplement: Supplementary file 1 [file supplementary]

## Supplementary Materials

# Antibacterial activities and mechanisms of plant flavonoids against Gram-negative bacteria based on the antibacterial statistical model

Yu Yan <sup>1,2,†</sup>, Xuexue Xia <sup>1,2,†</sup>, Aiman Fatima <sup>1</sup>, Li Zhang <sup>2</sup>, Ganjun Yuan <sup>1,2,\*</sup>, Fengxian Lian <sup>2</sup> and Yu Wang <sup>2</sup>

<sup>1</sup> Biotechnological Engineering Center for Pharmaceutical Research and Development, Jiangxi Agricultural University, Nanchang 330045, China; yanyu99668@163.com (Y.Y.); xiayuexue007@163.com (X.X.); aimanfatima222@hotmail.com (A.F.)

<sup>2</sup> Laboratory of Natural Medicine and Microbiological Drug, College of Bioscience and Bioengineering, Jiangxi Agricultural University, Nanchang 330045, China; zhangli43012022@163.com (L.Z.); 17848560041@163.com (F.L.); 15726263057@163.com (Y.W.)

† Authors who have equal contributions for this work.

\* Correspondence: gyuan@jxau.edu.cn; Tel.: +86-0791-83813459

**Figure S1.** Chemical structures of 52 plant flavonoids reported.

**Figure S2.** Another effective regression curve for equation (6) established from the LogP of the reported plant flavonoids and their log<sub>10</sub>(MIC) values.

**Figure S3.** Polynomial regression analyses for the LogP ( $x$ ) of plant flavonoids in Table S2 and the log<sub>10</sub>(IC<sub>50</sub>) ( $y$ ) to DNA gyrase.

**Table S1.** Comparison for the tested and reported MIC values of nine compounds.

**Table S2.** The LogP values and IC<sub>50</sub> to DNA gyrase of 14 reported flavonoids, together with their MICs against *E. coli*<sub>ss</sub> [39].

**Table S3.** Regression equations established from the LogP ( $x$ ) values of the reported flavonoids [39] and the IC<sub>50</sub> or Log<sub>10</sub>(IC<sub>50</sub>) (μM) values ( $y$ ) of these flavonoids to DNA gyrase.

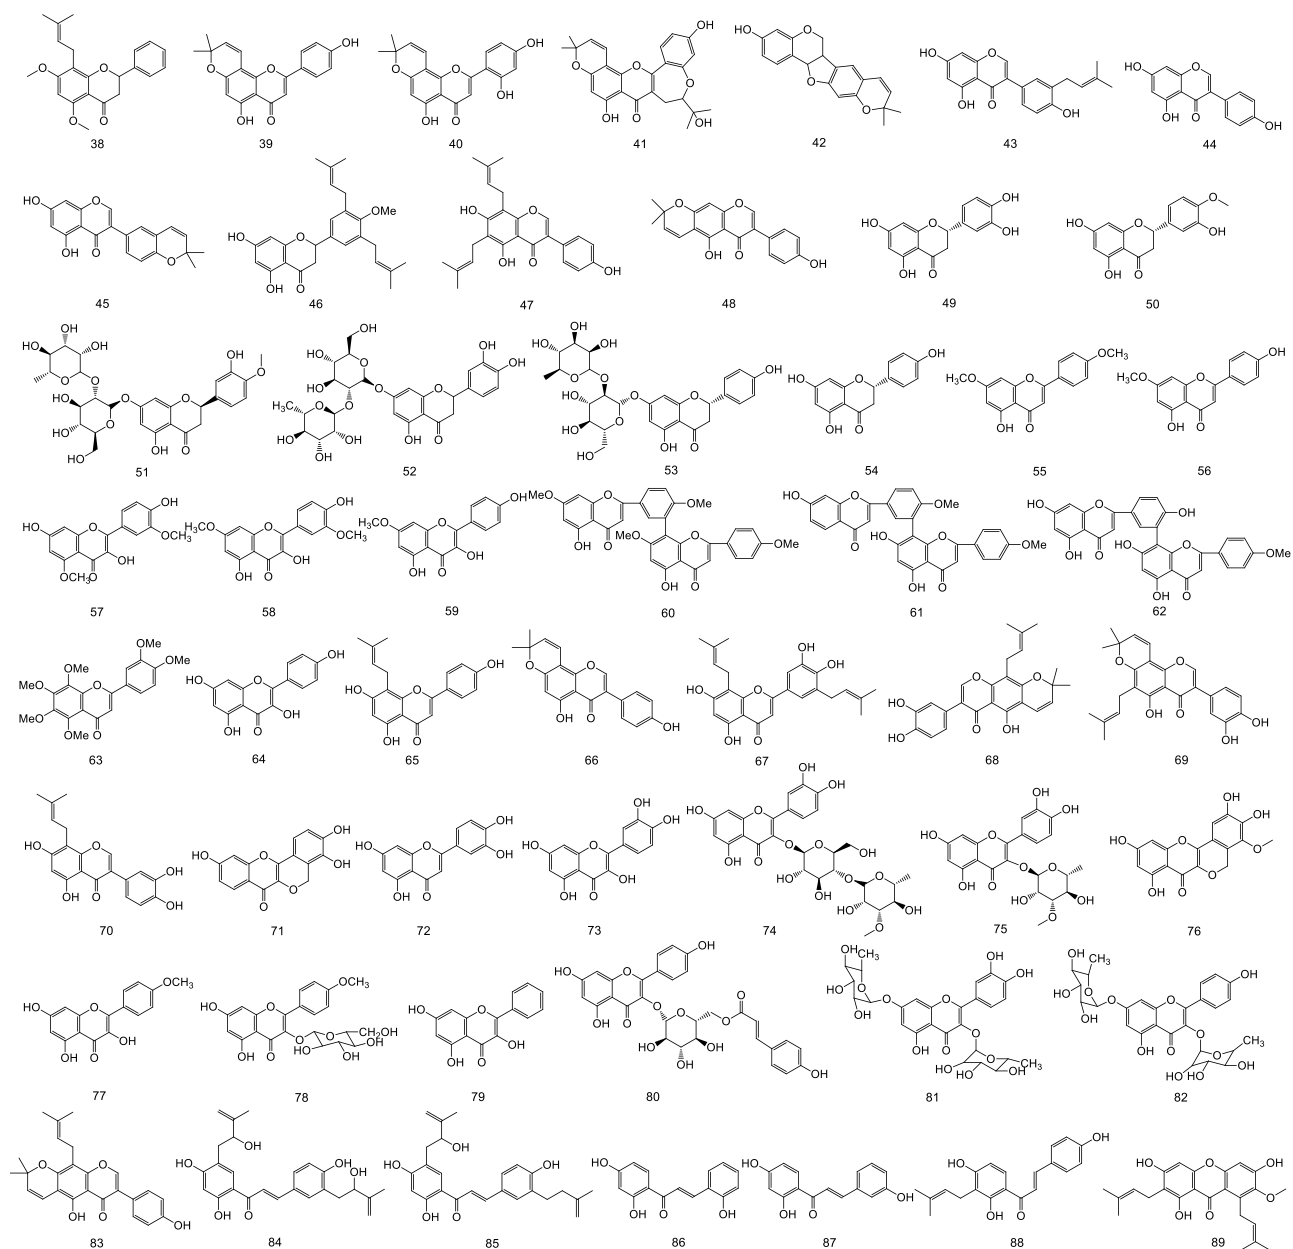

**Figure S1.** Chemical structures of 52 plant flavonoids reported.

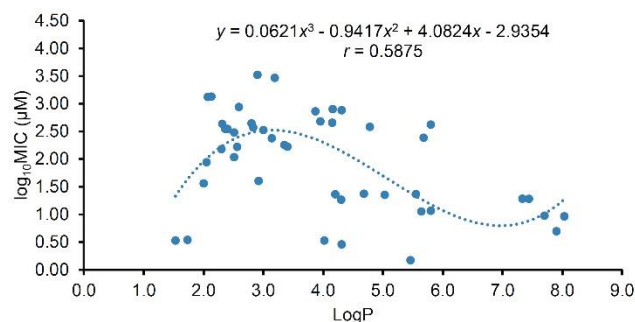

**Figure S2.** Another effective regression curve for equation (6) established from the LogP of the reported plant flavonoids and their  $\log_{10}(\text{MIC})$  values.

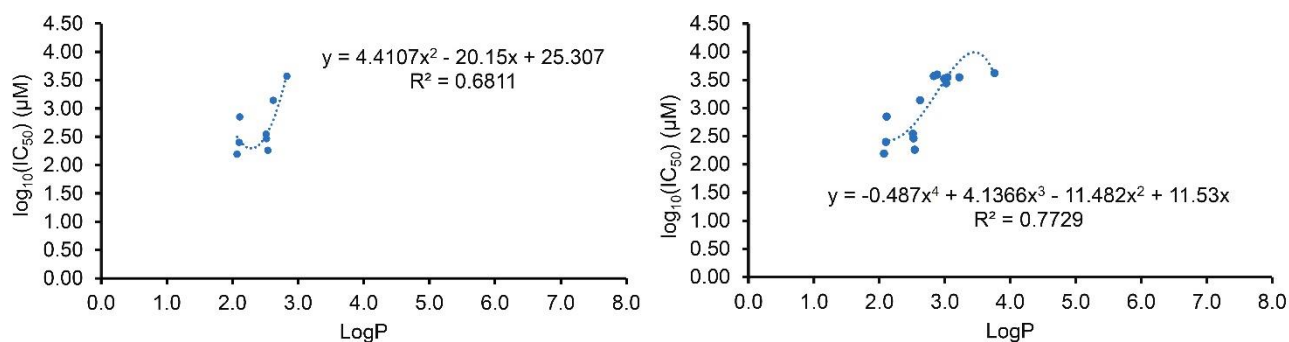

**Figure S3.** Polynomial regression analyses for the LogP ( $x$ ) of plant flavonoids in Table S2 and the  $\log_{10}(\text{IC}_{50})$  ( $y$ ) to DNA gyrase. Left and right panels presented the regression curves respectively for equations (2) and (4) in Table S3.

**Table S1.** Comparison for the tested and reported MIC values of nine compounds.

| Compound Number <sup>a</sup> | Compounds     | Tested MIC (μM) | Reported MIC (μM) | References |
|------------------------------|---------------|-----------------|-------------------|------------|
| 3 (53)                       | Naringin      | 1763.88         | >1722.53          | 3          |
| 6 (49)                       | Eriodictyol   | 7104.7          | 867.27            | 3          |
| 8 (50)                       | Hesperetin    | 6775.18         | 3308.19           | 3          |
| 9 (54)                       | Naringenin    | 7527.47         | 2938.37           | 3          |
| 13 (65)                      | Licoflavone C | 3026.36         | 23.08             | 7          |
| 15 (63)                      | Nobiletin     | 2544.73         | 439.86            | 6          |
| 27 (73)                      | Quercetin     | >3388.04        | 1323.45           | 10         |
| 28 (79)                      | Galangin      | 3789.22         | 370.04            | 12         |
| 37 (89)                      | α-mangostin   | 2494.7          | >311.84           | 16         |

<sup>a</sup>: The number out of bracket is the number of the tested flavonoids in Table 1, while that in bracket is the number of the reported flavonoids in Table 2.

**Table S2.** The LogP values and IC<sub>50</sub> to DNA gyrase of 14 flavonoids reported, together with their MICs against *E. coli*<sub>ss</sub> [39].<sup>a</sup>

| Compounds | LogP <sup>b</sup> | IC <sub>50</sub> (μg/mL) | IC <sub>50</sub> (μM) | Log <sub>10</sub> (IC <sub>50</sub> ) (μM) <sup>c</sup> | MIC (μg/mL) |
|-----------|-------------------|--------------------------|-----------------------|---------------------------------------------------------|-------------|
| 5a        | 2.07              | 47                       | 155.51                | 2.192                                                   | 31.25       |
| 5f        | 2.10              | 67.6                     | 250.15                | 2.398                                                   | >125        |
| 5d        | 2.11              | 225                      | 707.01                | 2.849                                                   | 62.5        |
| 5n        | 2.51              | 89.2                     | 350.85                | 2.545                                                   | 125         |
| 5h        | 2.52              | 83.3                     | 291.01                | 2.464                                                   | 62.5        |
| 5k        | 2.54              | 55                       | 181.97                | 2.260                                                   | 62.5        |
| 5c        | 2.62              | 418                      | 1383.01               | 3.141                                                   | 125         |
| 5g        | 2.83              | >500                     | >1850.21              | >3.568                                                  | >125        |
| 5b        | 2.88              | >500                     | >1966.65              | >3.595                                                  | >125        |
| 5j        | 2.99              | >500                     | >1665.17              | >3.522                                                  | >125        |
| 5l        | 3.02              | >500                     | >1387.66              | >3.443                                                  | >125        |
| 5i        | 3.04              | >500                     | >1758.89              | >3.546                                                  | >125        |
| 5m        | 3.22              | >500                     | >1758.89              | >3.546                                                  | >125        |
| 5e        | 3.76              | >500                     | >2098.72              | >3.623                                                  | >125        |

<sup>a</sup>: The structures, IC<sub>50</sub> (μg/mL), and MIC (μg/mL) of the designed flavonoids were reported by Ohemeng, *et al.*, and their MICs to *E. coli*<sub>ss</sub> were determined using the half dilution method [39].

<sup>b</sup>: The LogP values were calculated using the software ACD/Labs 6.0.

<sup>c</sup>: log<sub>10</sub>(IC<sub>50</sub>) means Log<sub>10</sub> of IC<sub>50</sub>.

**Table S3.** Regression equations established from the LogP (*x*) values of the reported flavonoids [39] and the IC<sub>50</sub> or Log<sub>10</sub>(IC<sub>50</sub>) (μM) values (*y*) of these flavonoids to DNA gyrase.<sup>a</sup>

| Equation number | Sample numbers ( <i>n</i> ) <sup>b</sup> | Regression equation ( <i>r</i> <sup>c</sup> )                                       | Coefficient of determination ( <i>R</i> <sup>2</sup> ) |
|-----------------|------------------------------------------|-------------------------------------------------------------------------------------|--------------------------------------------------------|
| (1)             | 8                                        | $y = 15268x^3 - 99002x^2 + 212413x - 150519$ (0.9777) <sup>d</sup>                  | 0.9559                                                 |
| (2)             |                                          | $y = 4.4107x^2 - 20.15x + 25.307$ (0.8253) <sup>e</sup>                             | 0.6811                                                 |
| (3)             | 14                                       | $y = -4709.9x^3 + 40214x^2 - 108812x + 95023$ (0.9175) <sup>d</sup>                 | 0.8418                                                 |
| (4)             |                                          | $y = -0.487x^4 + 4.1366x^3 - 11.482x^2 + 11.53x$ <sup>c</sup> (0.8791) <sup>e</sup> | 0.7729                                                 |

<sup>a</sup>: The LogP (*x*) values, and IC<sub>50</sub> and Log<sub>10</sub>(IC<sub>50</sub>) (μM) were shown in Table S2.

<sup>b</sup>: According to half dilution method, the IC<sub>50</sub> of compound 5g was set as 1000 μg/mL and used for the regression analyses in equations (1) and (2), and while all compounds with the IC<sub>50</sub> more than 500 μg/mL were set as 1000 μg/mL and used for those in equations (3) and (4), together with compounds 5a, 5f, 5d, 5n, 5h, 5k and 5c.

<sup>c</sup>: *r*, correlation coefficient; the significant level  $\alpha$  was set as 0.05, and the critical values of *r*<sub>0.975</sub> (6) and *r*<sub>0.975</sub> (12) were equal to 0.707 and 0.532, respectively.

<sup>d</sup>: Regression equations were established from the LogP (*x*) and the IC<sub>50</sub> (μM) (*y*) values.

<sup>e</sup>: Regression equations were established from the LogP (*x*) and the Log<sub>10</sub>(IC<sub>50</sub>) (μM) (*y*) values.
